# Supplementary material
Source: PubMed Central journal article supplement (PMC3431022)

| <b>Patients</b> | <b>Infiltrated cells (%)</b> | <b>Recurrence</b> | <b>Follow up (years)</b> | <b>Stage</b> | <b>ER</b> | <b>PR</b> | <b>HER-2</b> |
|-----------------|------------------------------|-------------------|--------------------------|--------------|-----------|-----------|--------------|
| VBR-V12c        | 20                           | No                | 4                        | NA           | -         | -         | -            |
| VBR-V10         | 20                           | No                | 3                        | IIA          | -         | -         | -            |
| VBR-13          | 20                           | No                | 7                        | IA           | -         | -         | +            |
| VBR-52          | 20                           | No                | 4                        | IIIA         | -         | -         | borderline   |
| VBR-04b         | 25                           | No                | 4                        | IIIA         | -         | -         | -            |
| VBR-70          | 25                           | No                | 6                        | IIB          | -         | -         | +            |
| VBR-12          | 30                           | No                | 7                        | IA           | +         | +         | +            |
| VBR-51          | 20                           | No                | 4                        | IIIC         | +         | +         | -            |
| VBR-23          | 25                           | No                | 6                        | IIB          | -         | -         | -            |
| <b>VBR-73</b>   | <b>50</b>                    | <b>Yes</b>        | <b>3</b>                 | <b>IA</b>    | <b>+</b>  | <b>+</b>  | <b>+</b>     |
| <b>VBR-31</b>   | <b>15</b>                    | <b>Yes</b>        | <b>3</b>                 | <b>IIIA</b>  | <b>NA</b> | <b>NA</b> | <b>NA</b>    |
| <b>VBR-80</b>   | <b>10</b>                    | <b>Yes</b>        | <b>1</b>                 | <b>IIA</b>   | <b>-</b>  | <b>-</b>  | <b>-</b>     |
| <b>VBR-8</b>    | <b>20</b>                    | <b>Yes</b>        | <b>5</b>                 | <b>IIB</b>   | <b>-</b>  | <b>-</b>  | <b>-</b>     |
| <b>VBR-77</b>   | <b>10</b>                    | <b>Yes</b>        | <b>3</b>                 | <b>IIA</b>   | <b>+</b>  | <b>-</b>  | <b>+</b>     |
| <b>VBR-28</b>   | <b>50</b>                    | <b>Yes</b>        | <b>3</b>                 | <b>IIA</b>   | <b>-</b>  | <b>-</b>  | <b>-</b>     |
| <b>VBR-76</b>   | <b>10</b>                    | <b>Yes</b>        | <b>3</b>                 | <b>IA</b>    | <b>-</b>  | <b>-</b>  | <b>-</b>     |
| <b>VBR-7</b>    | <b>20</b>                    | <b>Yes</b>        | <b>1</b>                 | <b>IIA</b>   | <b>+</b>  | <b>+</b>  | <b>+</b>     |

**Supplementary Table 1. Patient characteristics and their tumor specimens with > 10% infiltrating cells**

| Gene Name    | Fold-change | Gene Name | Fold-change | Gene Name | Fold-change |
|--------------|-------------|-----------|-------------|-----------|-------------|
| IGKC         | 15.50       | PVRIG     | 2.83        | SMARCC2   | 2.15        |
| IGL @        | 12.31       | IFIT3     | 2.82        | IGKV1D-8  | 2.14        |
| IGKC         | 11.21       | DCC       | 2.81        | Unknown   | 2.13        |
| LOC440871    | 9.92        | HLA-DRA   | 2.81        | PPP1R9B   | 2.13        |
| Unknown      | 9.21        | HLA-G     | 2.81        | APOE      | 2.13        |
| IGKV3-20     | 8.92        | Unknown   | 2.80        | NR1H3     | 2.12        |
| LOC440871    | 8.81        | CD19      | 2.79        | LILRB2    | 2.12        |
| Unknown      | 8.70        | KDM2A     | 2.77        | HLA-G     | 2.11        |
| LOC652493    | 8.67        | TBC1D10C  | 2.76        | DOK2      | 2.10        |
| CXCL9        | 8.52        | HLA-DRB5  | 2.76        | LILRB4    | 2.10        |
| IGL          | 8.43        | IRF8      | 2.75        | TNFRSF9   | 2.09        |
| LIPT1        | 8.10        | Unknown   | 2.73        | SLAMF8    | 2.09        |
| MS4A1        | 7.87        | GMFG      | 2.71        | AOAH      | 2.09        |
| LOC96610     | 7.78        | HLA-DQA2  | 2.71        | PAG1      | 2.08        |
| LOC100290481 | 7.49        | GZMB      | 2.71        | LAIR1     | 2.07        |
| Unknown      | 7.48        | HLA-DRB1  | 2.70        | Unknown   | 2.07        |
| LOC100132941 | 7.32        | PLEK      | 2.68        | SAMD3.    | 2.06        |
| IGKC         | 7.06        | IFI30     | 2.67        | FLJ31306  | 2.05        |
| IGLC1        | 7.01        | IL4I1     | 2.67        | C1QB      | 2.05        |
| Unknown      | 6.86        | PARP14    | 2.67        | Unknown   | 2.05        |
| KIAA1632     | 6.56        | OASL      | 2.67        | MCL1      | 2.03        |
| CCL23        | 6.56        | IL2RB     | 2.66        | CD53      | 2.03        |
| Unknown      | 6.04        | IGKC      | 2.64        | CCR7      | 2.02        |
| IGLC1        | 5.98        | PLAC8     | 2.62        | CD8A      | 2.01        |
| POU2AF1      | 5.95        | MGC29506  | 2.62        | GPR89B    | 2.00        |
| STAT1        | 5.48        | HLA-E     | 2.60        | Unknown   | 2.00        |
| Unknown      | 5.23        | CCL21     | 2.60        | APOL3     | 2.00        |
| GBP4         | 5.19        | SLC25A11  | 2.59        | PPA1      | 2.00        |
| GBP1         | 5.10        | CYFIP2    | 2.58        | GIMAP2    | 2.00        |
| IL7R         | 5.09        | IFI16     | 2.57        | RPS27     | 1.99        |
| Unknown      | 5.08        | Unknown   | 2.57        | CCDC108   | 1.99        |
| LOC642838    | 5.08        | GMFG      | 2.57        | Unknown   | 1.99        |
| LYZ          | 4.97        | PACRG     | 2.56        | STAT2     | 1.98        |
| CXCL10       | 4.89        | HOXC6     | 2.55        | HTATIP2   | 1.93        |
| UBD          | 4.78        | IRF1      | 2.55        | PPP1R3F   | 1.93        |
| GBP5         | 4.76        | HLA-L     | 2.54        | SAMSN1    | 1.93        |
| IGKC         | 4.61        | NKG7      | 2.54        | NFKBIL2   | 1.92        |
| Unknown      | 4.57        | Unknown   | 2.54        | Unknown   | 1.92        |
| PTPRC        | 4.57        | CASP1     | 2.53        | C5orf20   | 1.92        |
| LOC100293559 | 4.53        | FKBP11    | 2.52        | CTLA4     | 1.91        |
| IGKV3-20     | 4.50        | FAM173A   | 2.49        | ZAP70     | 1.91        |
| IGLC1        | 4.45        | VNN2      | 2.49        | EFR3A     | 1.91        |
| LOC100289290 | 4.44        | ZDHHC2    | 2.48        | DNAH      | 1.90        |
| LOC100287372 | 4.39        | HLA-H     | 2.48        | IL15RA    | 1.90        |
| OCLN         | 4.36        | TARP      | 2.47        | OS9       | 1.90        |
| IL23A        | 4.10        | PSMB8     | 2.46        | PSME1     | 1.90        |
| GZMA         | 4.07        | TAP1      | 2.45        | SAMHD1    | 1.90        |
| GBP3         | 4.06        | PIM2      | 2.44        | Unknown   | 1.90        |
| CXCL11       | 4.02        | AIF1      | 2.43        | C1QA      | 1.88        |
| BMS1P4       | 4.00        | Unknown   | 2.42        | TAGAP     | 1.87        |

|              |      |           |      |              |      |
|--------------|------|-----------|------|--------------|------|
| GPR171       | 3.99 | HLA-F     | 2.42 | ICAM2        | 1.87 |
| Unknown      | 3.90 | PLTP      | 2.41 | RPL26        | 1.87 |
| TDR @        | 3.88 | FYB       | 2.40 | LOC100128203 | 1.85 |
| PSMB9        | 3.86 | HLA-DMA   | 2.40 | CNTNAP5      | 1.84 |
| LOC642424    | 3.80 | CNN2      | 2.40 | BTN3A1       | 1.84 |
| LOC100130100 | 3.80 | EPSTI1    | 2.40 | SH2D2A       | 1.83 |
| IL7R         | 3.74 | Unknown   | 2.40 | PSMB9        | 1.82 |
| IGF2         | 3.73 | TRAF3IP3  | 2.39 | IGHA1        | 1.82 |
| MAFG         | 3.72 | LOC440839 | 2.39 | CRTAM        | 1.82 |
| CD48         | 3.65 | WIPF1     | 2.39 | Unknown      | 1.81 |
| CCR2         | 3.64 | CYBB      | 2.38 | ZNF90        | 1.81 |
| ISG20        | 3.63 | ARHGAP25  | 2.38 | GCET2        | 1.80 |
| GIMAP5       | 3.61 | IGKC      | 2.38 | ZBP1         | 1.80 |
| CD74         | 3.59 | HLA-L     | 2.38 | NR3C1        | 1.79 |
| LCK-         | 3.58 | TFEC      | 2.37 | LILRB1       | 1.78 |
| LTB          | 3.56 | RPS27     | 2.37 | HMGNA4       | 1.78 |
| GIMAP6       | 3.50 | NCF1      | 2.36 | C1QC         | 1.77 |
| IRF4         | 3.47 | POU2F2    | 2.35 | S1PR4        | 1.77 |
| GNLY         | 3.40 | EMB       | 2.35 | LOC439949    | 1.76 |
| IFI44L       | 3.39 | ICAM3     | 2.34 | PUM2         | 1.76 |
| MMP10        | 3.38 | GIMAP4    | 2.33 | LEPROTL1     | 1.76 |
| CD247        | 3.37 | HLA-G     | 2.33 | ACAP1        | 1.75 |
| LGALS2       | 3.33 | Unknown   | 2.32 | RASSF2       | 1.75 |
| Unknown      | 3.31 | SLAMF1    | 2.31 | RPL38        | 1.75 |
| ZNF341       | 3.27 | EVI2B     | 2.30 | C2orf60      | 1.74 |
| GIMAP7       | 3.27 | SP110     | 2.30 | NR1H3        | 1.71 |
| B2M          | 3.23 | DNAJC5G   | 2.30 | CYP2S1       | 1.71 |
| FGF19        | 3.21 | NYNRIN    | 2.29 | GCH1         | 1.71 |
| STAT1        | 3.18 | MBP       | 2.28 | FNBP1        | 1.70 |
| ITGAL        | 3.18 | SIT1      | 2.28 | TRIM25       | 1.70 |
| CARD16       | 3.12 | ROBO4     | 2.28 | CD97         | 1.70 |
| CD2          | 3.12 | SP140     | 2.28 | TBCC         | 1.69 |
| ABCC6        | 3.10 | APOBEC3G  | 2.27 | LAP3         | 1.69 |
| ITM2A        | 3.07 | PRKCB     | 2.27 | Unknown      | 1.69 |
| IGJ          | 3.07 | BTG1      | 2.27 | Unknown      | 1.68 |
| IGLV6        | 3.05 | TMEM149   | 2.26 | AQP12A       | 1.64 |
| HLA-B        | 3.05 | MIR155HG  | 2.26 | IL2RA        | 1.63 |
| B2M          | 3.03 | AIM2      | 2.26 | PFN1         | 1.63 |
| FLJ40330     | 3.00 | WARS      | 2.26 | NBPF15       | 1.62 |
| ASB16        | 2.98 | IGKC      | 2.23 | XCL2         | 1.61 |
| P2RX5        | 2.97 | LILRB2    | 2.22 | CR1          | 1.61 |
| CTSC         | 2.97 | PSME2     | 2.22 | LAX1         | 1.61 |
| FLJ40330     | 2.95 | HLA-C     | 2.20 | FGD2         | 1.58 |
| CD79A        | 2.95 | ARHGAP9   | 2.20 | C19orf35     | 1.58 |
| CST7         | 2.95 | TNFSF13B  | 2.20 | NCRNA00183   | 1.51 |
| HLA-DPA1     | 2.94 | PPP1R16B  | 2.19 | CD28         | 1.49 |
| LCP1         | 2.92 | Unknown   | 2.19 | IL18RAP      | 1.48 |
| ERICH1       | 2.91 | RPS27     | 2.17 | EDEM1        | 1.48 |
| HLA-DRA      | 2.90 | IFIT5     | 2.16 | FPR3         | 1.45 |
| ARL8A        | 2.90 | IL21R     | 2.16 |              |      |

**Supplementary Table 2. List of up-regulated genes in tumor lesions of patients with relapse-free survival**

**Supplementary Table 3. List of down-regulated genes in tumor lesions of patients with relapse-free survival**

| <b>Gene Name</b> | <b>Fold-change</b> | <b>Gene Name</b> | <b>Fold-change</b> |
|------------------|--------------------|------------------|--------------------|
| C1QTNF3          | 0.21               | SLC35E1          | 0.53               |
| BHMT2            | 0.36               | FAM108C1         | 0.54               |
| JDP2             | 0.38               | CERCAM           | 0.55               |
| GJB2             | 0.39               | RIC8A            | 0.55               |
| PYGL             | 0.41               | PTDSS2           | 0.56               |
| PER3             | 0.42               | LOC650226        | 0.57               |
| COMP             | 0.42               | MAN1B1           | 0.59               |
| LOC100132800     | 0.43               | TK2              | 0.59               |
| ULK1             | 0.43               | VPS37C           | 0.60               |
| C14orf45         | 0.45               | LOC116437        | 0.60               |
| TCEAL3           | 0.45               | NP_001013662.1   | 0.60               |
| BBS2             | 0.46               | PHF13            | 0.60               |
| TMC4             | 0.47               | CTSF             | 0.60               |
| TNFAIP8L1        | 0.49               | SLC16A5          | 0.61               |
| COPS7A           | 0.49               | GPR107           | 0.61               |
| IER2             | 0.50               | IFT20            | 0.62               |
| ITGB5            | 0.50               | SLC12A4          | 0.62               |
| C1QTNF6          | 0.51               | CREB5            | 0.62               |
| VKORC1           | 0.52               | PHF2             | 0.63               |
| ADAM20           | 0.52               | ZFP14            | 0.63               |
| C22orf39         | 0.53               | MYOM1            | 0.64               |
| SIRPB1           | 0.53               | SNUPN            | 0.64               |
| VPS24            | 0.53               | ICMT             | 0.64               |
| PYROXD2          | 0.53               | ANXA4            | 0.67               |
| GFPT1            | 0.53               | GATSL3           | 0.67               |

A

### IV pathway: B cell development

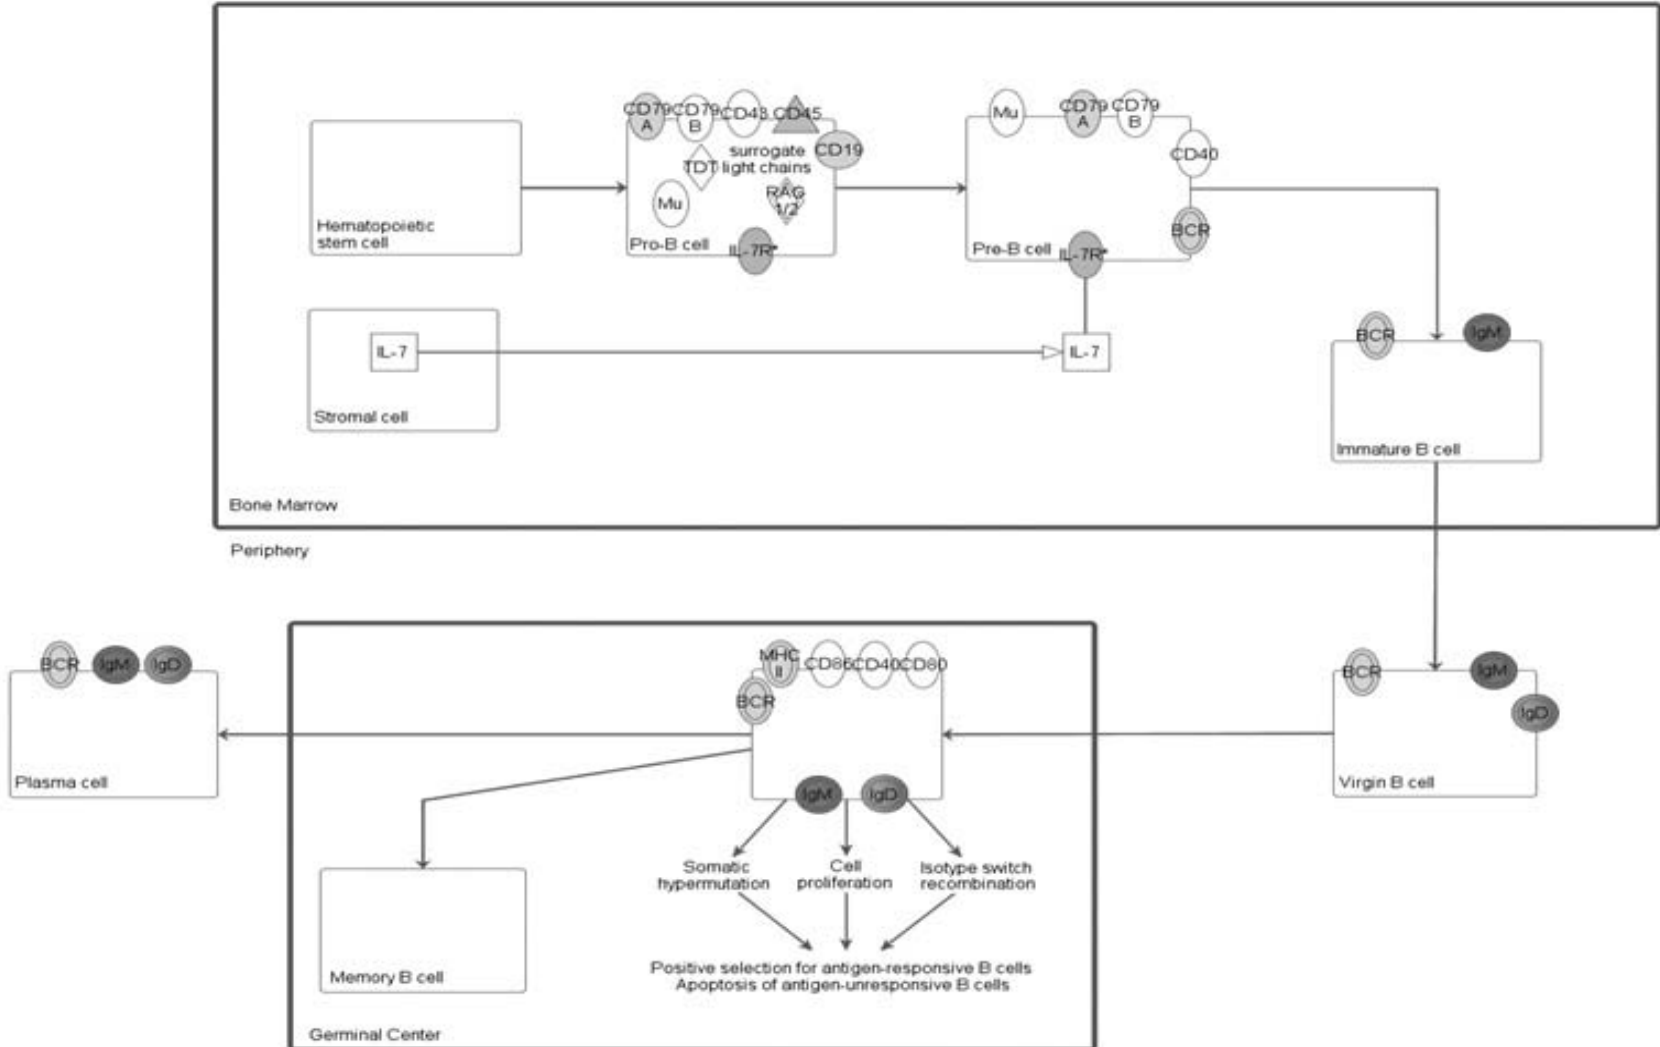

B

I pathway: Antigen presentation Pathway

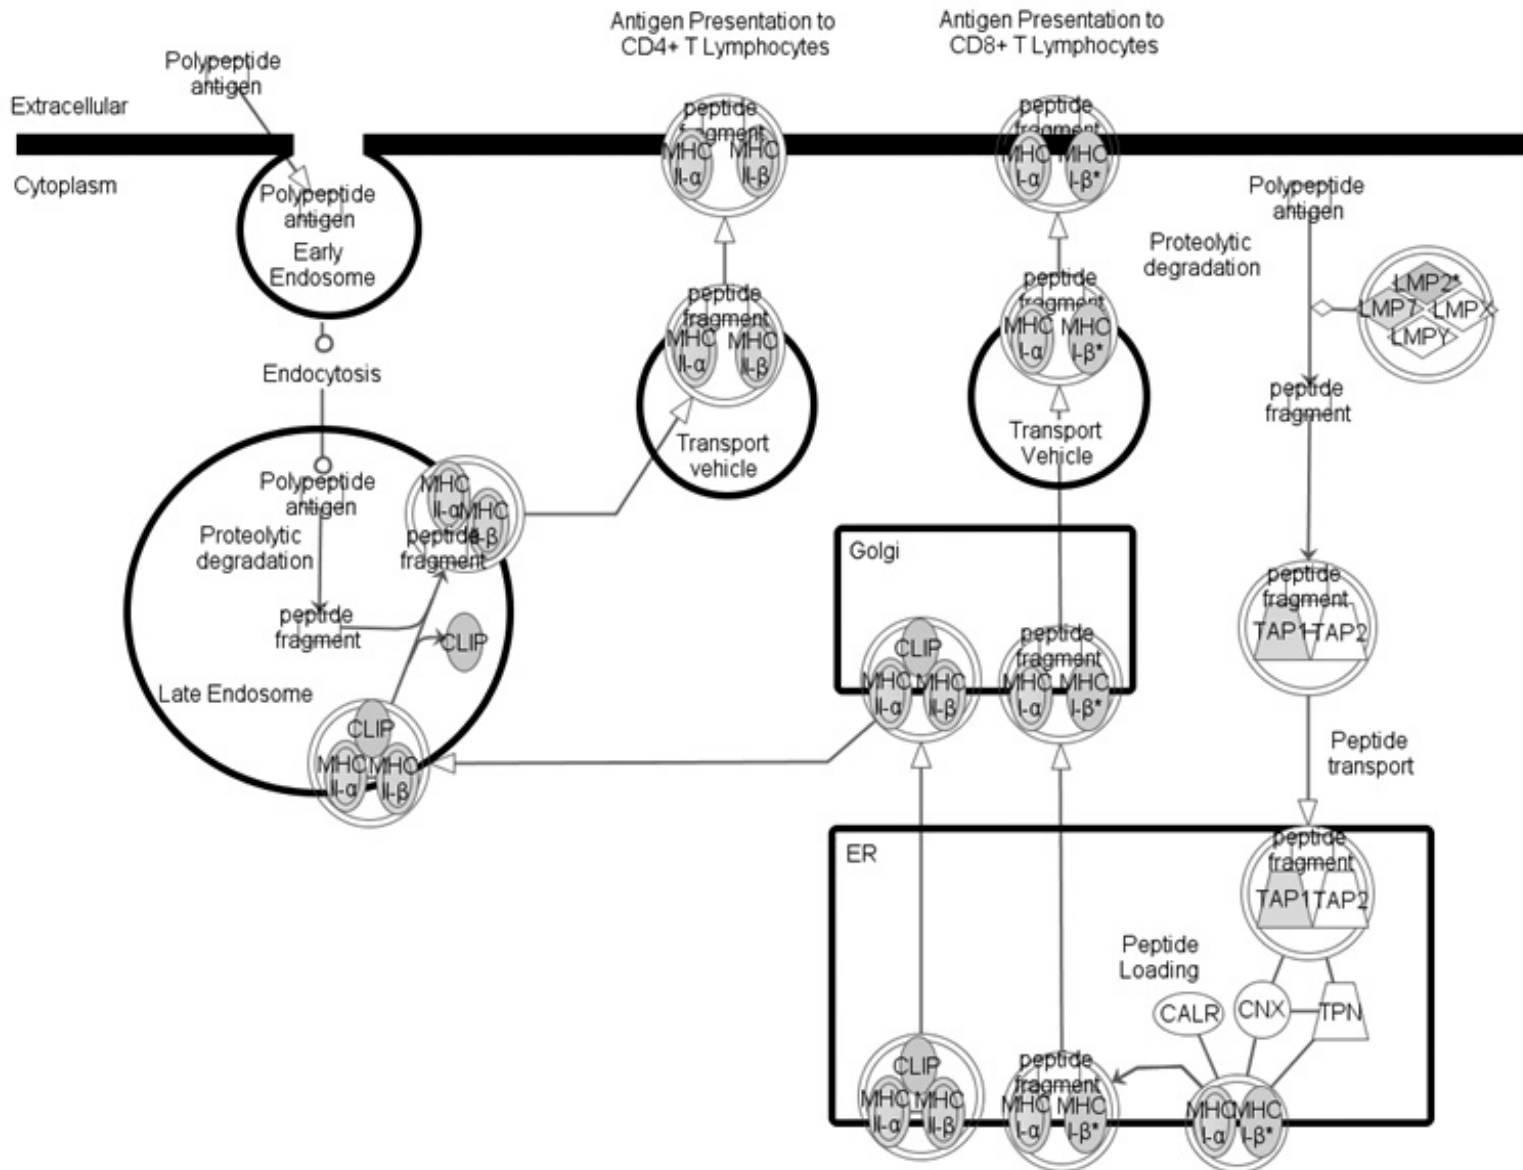

### III pathway: Graft vs host disease signaling

C

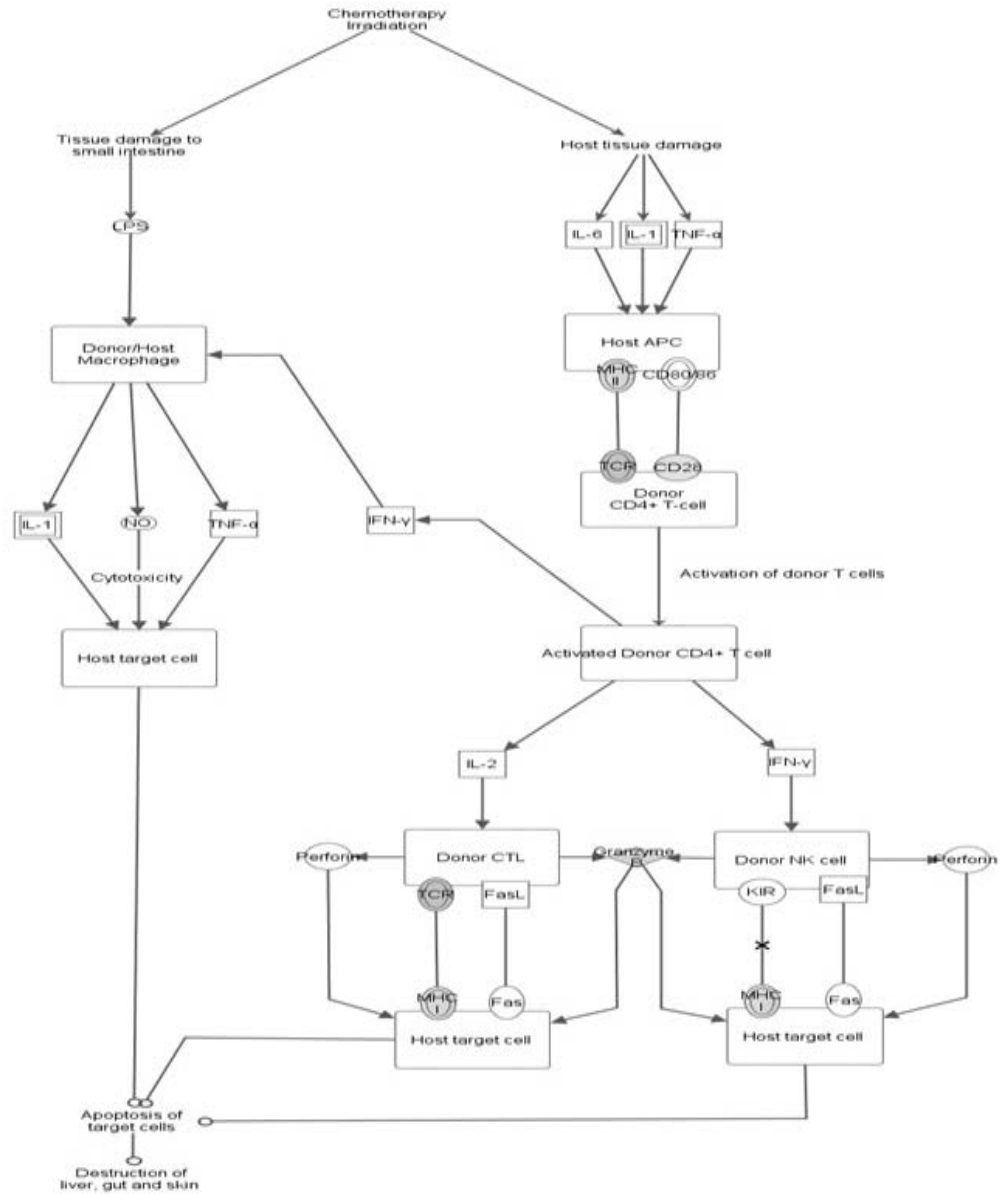



XVIII pathway: interferon signaling

D

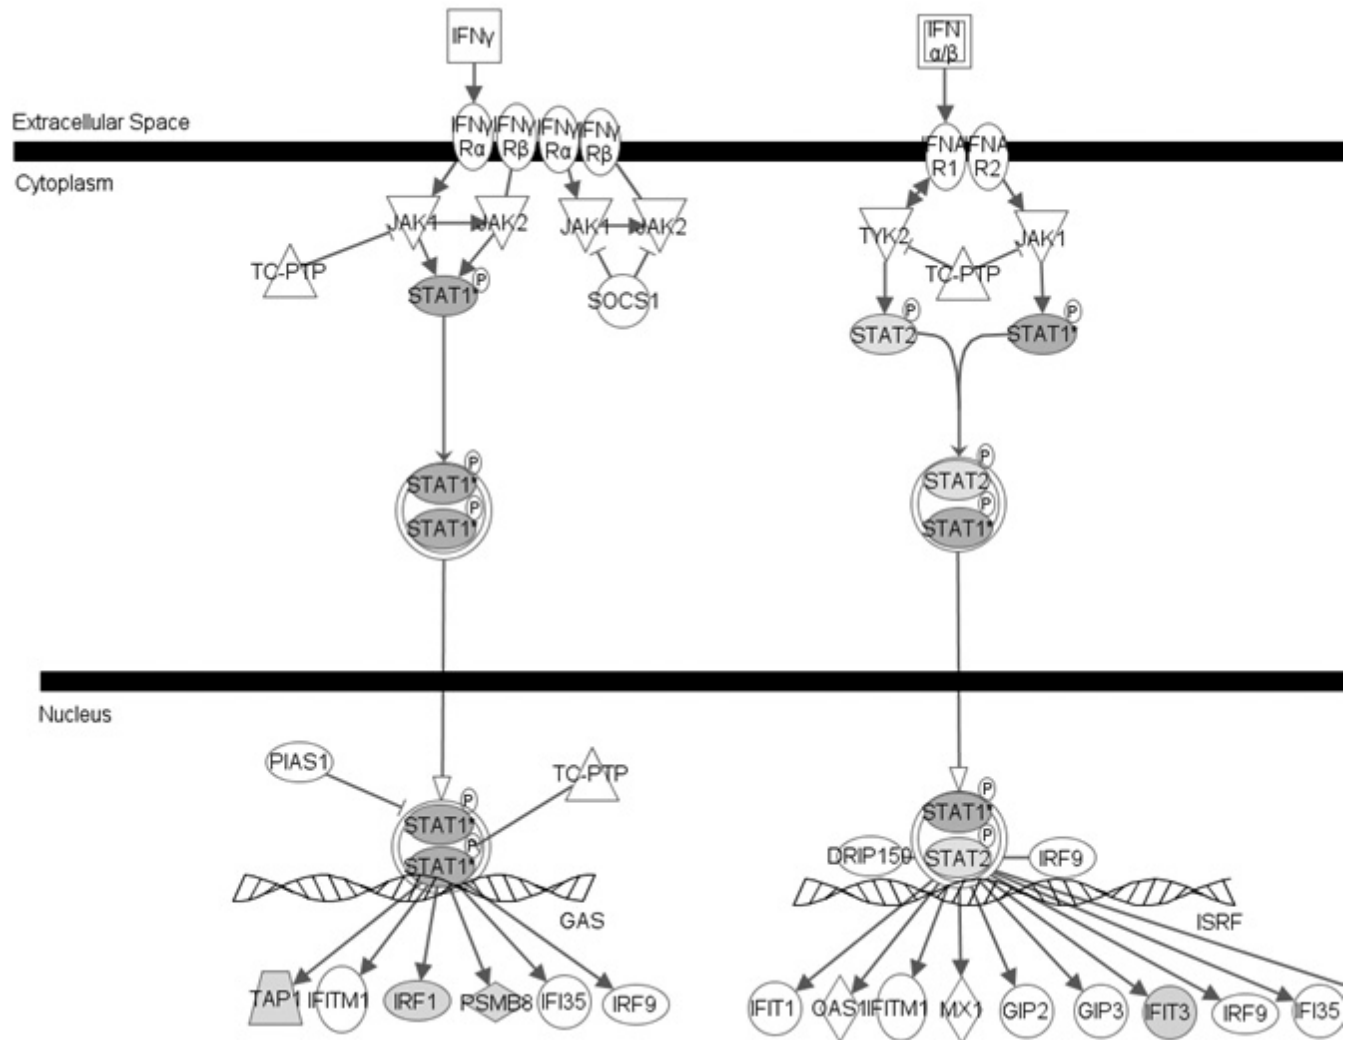

E

# VII pathway: Primary immunodeficiency signaling

Primary Immunodeficiency Signaling

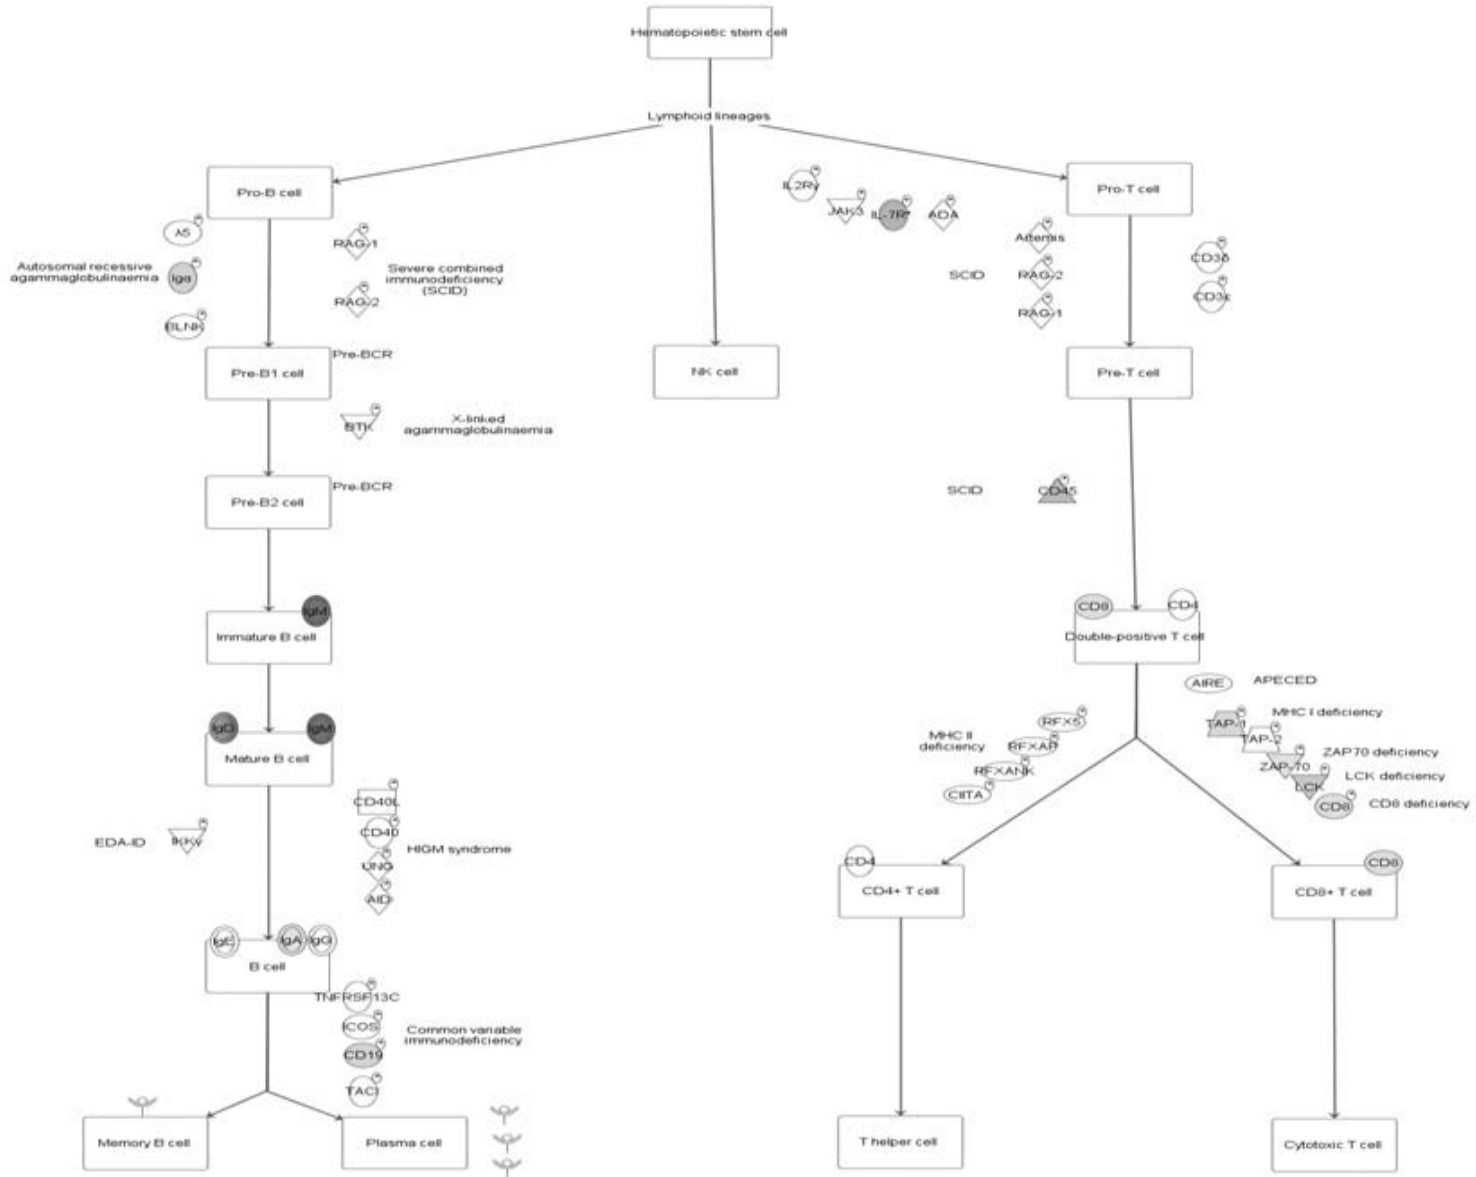

Supplement: NIHMS400851-supplement-Supplementary_data.pdf [file NIHMS400851-supplement-Supplementary_data.pdf]
